# Supplementary material for: Txnip deficiency promotes β-cell proliferation in the HFD-induced obesity mouse model
Source: PubMed Central journal article supplement — Endocr Connect. 2022 Mar 16;11(4):e210641. doi: 10.1530/EC-21-0641 (PMC9066588; doi:10.1530/ec-21-0641), 2022-03-16
Supplement: supplementary_material.pdf [file supplementary_material.pdf]

## Supplementary materials:

To detect changes in cytokine levels related to  $\beta$  cell proliferation, we measured serum total *GLP-1* and *Leptin* levels in mice. Results showed that the serum *GLP-1* significantly increased in HFD-induced mice. *GLP-1* levels also significantly increased in KO-HFD compared to WT-HFD, whereas there was no significant difference between WT and KO groups of mice. Similarly, serum *Leptin* significantly increased in HFD-induced mice, whereas *Leptin* levels significantly decreased in KO-HFD compared to WT-HFD, and there was no significant difference between WT and KO groups of mice.

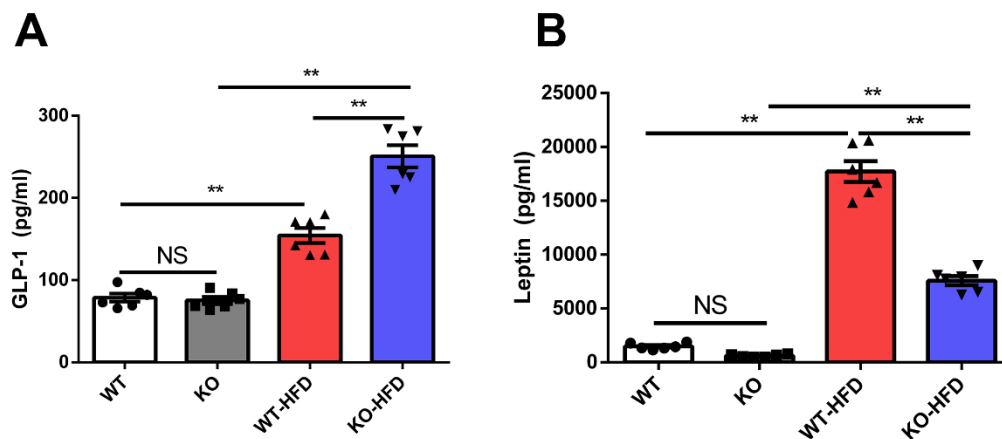

**Fig 1. *Txnip* deficiency and HFD increased *GLP-1* and *Leptin* secretion. (A)**

HFD-induced *GLP-1* levels in mice significantly increased compared to NC fed mice.

\*\*Significant difference in *GLP-1* level for KO-HFD versus WT-HFD mice. No significant differences were observed for the WT and KO groups of mice (n=6); **(B)** HFD-induced *Leptin* levels in mice significantly increased compared to NC fed mice. \*\*Significant difference in *Leptin* level for KO-HFD versus WT-HFD mice. No significant differences were observed for the WT and KO groups of mice (n=6). NS, not significant, \*\* $p < 0.01$ .
